# Supplementary material for: Morphological and chemical profiling of biochar derived from invasive aquatic weed towards bio-nanofertilizer development
Source: Royal Society of Chemistry journal article supplement (doi:10.1039/d5su00052a), 2025-01-01
Supplement: d5su00052a1.xlsx [file d5su00052a1.xlsx]

## Sheet: statistics
ONEWAY Zn Cu BY Time
/STATISTICS DESCRIPTIVES
/PLOT MEANS
/MISSING ANALYSIS
/POSTHOC=DUNCAN ALPHA(0.05).
Oneway
Notes
Output Created		03-JUL-2024 02:06:05
Comments
Input	Active Dataset	DataSet1
	Filter	<none>
	Weight	<none>
	Split File	<none>
	N of Rows in Working Data File	24
Missing Value Handling	Definition of Missing	User-defined missing values are treated as missing.
	Cases Used	Statistics for each analysis are based on cases with no missing data for any variable in the analysis.
Syntax		ONEWAY Zn Cu BY Time /STATISTICS DESCRIPTIVES /PLOT MEANS /MISSING ANALYSIS /POSTHOC=DUNCAN ALPHA(0.05).
Resources	Processor Time	00:00:00.13
	Elapsed Time	00:00:00.27
Descriptives
		N	Mean	Std. Deviation	Std. Error	95% Confidence Interval for Mean		Minimum	Maximum
						Lower Bound	Upper Bound
Zn	.00	3	0.00666667	0.0057735	0.00333333	-0.00767551	0.0210088	0	0.01
	1.00	3	0	0	0	0	0	0	0
	2.00	3	-0.00333333	0.0057735	0.00333333	-0.0176755	0.0110088	-0.01	0
	3.00	3	-0.00333333	0.0057735	0.00333333	-0.0176755	0.0110088	-0.01	0
	4.00	3	-0.00666667	0.0057735	0.00333333	-0.0210088	0.00767551	-0.01	0
	5.00	3	0	0	0	0	0	0	0
	6.00	3	0	0	0	0	0	0	0
	7.00	3	0	0	0	0	0	0	0
	Total	24	-0.000833333	0.0050361	0.00102799	-0.00295989	0.00129323	-0.01	0.01
Cu	.00	3	0.306667	0.0057735	0.00333333	0.292324	0.321009	0.3	0.31
	1.00	3	0.17	0.01	0.0057735	0.145159	0.194841	0.16	0.18
	2.00	3	0.126667	0.0057735	0.00333333	0.112324	0.141009	0.12	0.13
	3.00	3	0.05	0.0173205	0.01	0.00697347	0.0930265	0.04	0.07
	4.00	3	0.03	0	0	0.03	0.03	0.03	0.03
	5.00	3	0.02	0	0	0.02	0.02	0.02	0.02
	6.00	3	0.0166667	0.0057735	0.00333333	0.00232449	0.0310088	0.01	0.02
	7.00	3	-0.00666667	0.0057735	0.00333333	-0.0210088	0.00767551	-0.01	0
	Total	24	0.0891667	0.102062	0.0208333	0.0460696	0.132264	-0.01	0.31
ANOVA
		Sum of Squares	df	Mean Square	F	Sig.
Zn	Between Groups	0.000316667	7	4.52381e-05	2.71429	0.0465048
	Within Groups	0.000266667	16	1.66667e-05
	Total	0.000583333	23
Cu	Between Groups	0.238517	7	0.0340738	511.107	1.35738e-17
	Within Groups	0.00106667	16	6.66667e-05
	Total	0.239583	23
Post Hoc Tests
Homogeneous Subsets
Zn
Duncana
Time	N	Subset for alpha = 0.05
		1	2
4.00	3	-0.00666667
2.00	3	-0.00333333
3.00	3	-0.00333333
1.00	3	0	0
5.00	3	0	0
6.00	3	0	0
7.00	3	0	0
.00	3		0.00666667
Sig.		0.0950874	0.0884566
Means for groups in homogeneous subsets are displayed.
a. Uses Harmonic Mean Sample Size = 3.000.
Cu
Duncana
Time	N	Subset for alpha = 0.05
		1	2	3	4	5	6
7.00	3	-0.00666667
6.00	3		0.0166667
5.00	3		0.02
4.00	3		0.03
3.00	3			0.05
2.00	3				0.126667
1.00	3					0.17
.00	3						0.306667
Sig.		1	0.074991	1	1	1	1
Means for groups in homogeneous subsets are displayed.
a. Uses Harmonic Mean Sample Size = 3.000.
Means Plots
ONEWAY Ca K Mg P S BY Sample
/STATISTICS DESCRIPTIVES
/MISSING ANALYSIS
/POSTHOC=DUNCAN ALPHA(0.05).
Oneway
Notes
Output Created		02-AUG-2024 18:51:02
Comments
Input	Active Dataset	DataSet0
	Filter	<none>
	Weight	<none>
	Split File	<none>
	N of Rows in Working Data File	90
Missing Value Handling	Definition of Missing	User-defined missing values are treated as missing.
	Cases Used	Statistics for each analysis are based on cases with no missing data for any variable in the analysis.
Syntax		ONEWAY Ca K Mg P S BY Sample /STATISTICS DESCRIPTIVES /MISSING ANALYSIS /POSTHOC=DUNCAN ALPHA(0.05).
Resources	Processor Time	00:00:00.03
	Elapsed Time	00:00:00.05
[DataSet0]
Descriptives
		N	Mean	Std. Deviation	Std. Error	95% Confidence Interval for Mean		Minimum	Maximum
						Lower Bound	Upper Bound
Ca	1	15	3.36026	4.35208	1.1237	0.950164	5.77037	0.827029	11.987
	2	15	3.31493	3.98012	1.02766	1.11081	5.51905	0.999264	11.2126
	3	15	3.00751	4.28268	1.10578	0.63584	5.37918	0.687888	11.6391
	4	15	2.54302	3.37335	0.870996	0.674915	4.41111	0.589593	9.30584
	5	15	4.0833	4.43849	1.14601	1.62535	6.54126	1.29896	13.638
	6	15	3.92738	5.07064	1.30923	1.11936	6.73541	0.883399	13.8011
	Total	90	3.37273	4.19118	0.441789	2.49491	4.25056	0.589593	13.8011
K	1	15	1469.57	2197.9	567.495	252.411	2686.72	64.5495	5996.19
	2	15	1187.81	1977.16	510.5	92.897	2282.73	49.6332	5159.83
	3	15	1050.06	1743.69	450.22	84.4399	2015.69	58.0117	4506.43
	4	15	1061.91	1710.83	441.734	114.485	2009.33	62.0665	4398.35
	5	15	1020.15	1507.61	389.264	185.261	1855.04	23.1981	3998.41
	6	15	971.921	1461.22	377.286	162.723	1781.12	20.2403	3715.61
	Total	90	1126.9	1742.13	183.636	762.022	1491.78	20.2403	5996.19
Mg	1	15	11.1397	15.3983	3.97582	2.61238	19.6669	2.38736	42.0657
	2	15	11.7123	15.5089	4.00438	3.1238	20.3009	3.11733	42.1682
	3	15	8.96724	13.7177	3.5419	1.37063	16.5639	1.83739	36.72
	4	15	5.63695	7.09036	1.83072	1.71044	9.56346	1.6328	20.2912
	5	15	20.8882	23.8511	6.15831	7.67997	34.0965	6.35275	69.134
	6	15	24.7256	34.3734	8.87517	5.69025	43.7609	5.73583	91.1131
	Total	90	13.845	20.8246	2.19511	9.48337	18.2066	1.6328	91.1131
P	1	15	11.5314	4.98509	1.28715	8.77071	14.292	6.48082	19.6644
	2	15	9.85562	5.45404	1.40823	6.83528	12.876	4.12457	19.3881
	3	15	10.9724	5.32442	1.37476	8.0238	13.9209	4.81896	21.0344
	4	15	13.3419	7.52146	1.94203	9.17661	17.5071	4.27611	25.1683
	5	15	5.81111	3.97507	1.02636	3.60979	8.01243	2.39794	14.1555
	6	15	5.73131	3.32587	0.858735	3.88951	7.57312	3.12579	12.4063
	Total	90	9.54061	5.86752	0.618491	8.31168	10.7695	2.39794	25.1683
S	1	15	16.3662	29.3256	7.57183	0.126212	32.6061	0.37015	76.069
	2	15	16.5211	32.1945	8.31259	-1.30763	34.3499	0.336882	79.4613
	3	15	16.6856	33.2817	8.59331	-1.74526	35.1164	0.193564	82.5481
	4	15	16.9898	33.7337	8.71001	-1.69132	35.6709	0.219488	83.8874
	5	15	8.77115	16.5023	4.26088	-0.367521	17.9098	0.232466	41.8554
	6	15	9.72519	18.6902	4.82578	-0.625082	20.0755	0.191645	46.5199
	Total	90	14.1765	27.5998	2.90928	8.39583	19.9572	0.191645	83.8874
ANOVA
		Sum of Squares	df	Mean Square	F	Sig.
Ca	Between Groups	24.568	5	4.9136	0.268223	0.929269
	Within Groups	1538.8	84	18.3191
	Total	1563.37	89
K	Between Groups	2.50009e+06	5	500018	0.156947	0.977355
	Within Groups	2.67615e+08	84	3.1859e+06
	Total	2.70115e+08	89
Mg	Between Groups	4065.4	5	813.079	1.97791	0.0902489
	Within Groups	34530.8	84	411.081
	Total	38596.2	89
P	Between Groups	734.725	5	146.945	5.29907	0.000279516
	Within Groups	2329.35	84	27.7303
	Total	3064.07	89
S	Between Groups	1103.01	5	220.601	0.277849	0.924063
	Within Groups	66692.7	84	793.961
	Total	67795.7	89
Post Hoc Tests
Homogeneous Subsets
Ca
Duncana
Sample	N	Subset for alpha = 0.05
		1
4	15	2.54302
3	15	3.00751
2	15	3.31493
1	15	3.36026
6	15	3.92738
5	15	4.0833
Sig.		0.398603
Means for groups in homogeneous subsets are displayed.
a. Uses Harmonic Mean Sample Size = 15.000.
K
Duncana
Sample	N	Subset for alpha = 0.05
		1
6	15	971.921
5	15	1020.15
3	15	1050.06
4	15	1061.91
2	15	1187.81
1	15	1469.57
Sig.		0.513768
Means for groups in homogeneous subsets are displayed.
a. Uses Harmonic Mean Sample Size = 15.000.
Mg
Duncana
Sample	N	Subset for alpha = 0.05
		1	2
4	15	5.63695
3	15	8.96724	8.96724
1	15	11.1397	11.1397
2	15	11.7123	11.7123
5	15	20.8882	20.8882
6	15		24.7256
Sig.		0.0685378	0.0595782
Means for groups in homogeneous subsets are displayed.
a. Uses Harmonic Mean Sample Size = 15.000.
P
Duncana
Sample	N	Subset for alpha = 0.05
		1	2
6	15	5.73131
5	15	5.81111
2	15		9.85562
3	15		10.9724
1	15		11.5314
4	15		13.3419
Sig.		0.966997	0.101434
Means for groups in homogeneous subsets are displayed.
a. Uses Harmonic Mean Sample Size = 15.000.
S
Duncana
Sample	N	Subset for alpha = 0.05
		1
5	15	8.77115
6	15	9.72519
1	15	16.3662
2	15	16.5211
3	15	16.6856
4	15	16.9898
Sig.		0.49444
Means for groups in homogeneous subsets are displayed.
a. Uses Harmonic Mean Sample Size = 15.000.

## Sheet: data
		Total 5-day nutrient release/availability data (ppm per gram of sample)
		Ca	K	Mg	P	S	N
	A1	3.36026	1469.57	11.1397	11.5314	16.3662	1360.35
	B1	3.31493	1187.81	11.7123	9.85562	16.5211	1415.96
	C1	3.00751	1050.06	8.96724	10.9724	16.6856	1382.11
	A2	2.54302	1061.91	5.63695	13.3419	16.9898	1508.51
	B2	4.0833	1020.15	20.8882	5.81111	8.77115	2660.14
	C2	3.92738	971.921	24.7256	5.73131	9.72519	2922.14
		Total 5-day nutrient release/availability data (%)
		Ca	K	Mg	5	S	N
	A1	0.0336026	14.6957	0.111397	0.115314	0.163662	13.6035
	B1	0.0331493	11.8781	0.117123	0.0985562	0.165211	14.1596
	C1	0.0300751	10.5006	0.0896724	0.109724	0.166856	13.8211
	A2	0.0254302	10.6191	0.0563695	0.133419	0.169898	15.0851
	B2	0.040833	10.2015	0.208882	0.0581111	0.0877115	26.6014
	C2	0.0392738	9.71921	0.247256	0.0573131	0.0972519	29.2214
		Biochar concentration by SEM-EDX (wt %)								Liming capacity
		Ca	K	Mg	P	S	N	C			%CCeq
	A1	2.33	7.57	0.93	0.47	0.26	3.95	78.95		A1	28.9427
	B1	4.5	13.18	0.99	0.66	0.23	3.28	67.03		B1	25.3895
	C1	4.69	10.77	0.92	0.73	0.22	3.25	74.19		C1	23.8548
	A2	3.83	8.96	0.74	0.83	0.24	5.32	73.08		A2	22.6037
	B2	3.78	12.21	1.05	0.54	0.06	2.63	67.77		B2	16.8485
	C2	2.64	9.28	0.86	0.46	0.06	3.67	73.84		C2	14.7633
		Total 5-day nutrient release/availability data (%)
		Ca	K	Mg	P	S	N				H/C
	A1	0.0336026	14.6957	0.111397	0.115314	0.163662	13.6035			A1	0.0316656
	B1	0.0331493	11.8781	0.117123	0.0985562	0.165211	14.1596			B1	0.0372967
	C1	0.0300751	10.5006	0.0896724	0.109724	0.166856	13.8211			C1	0.0336973
	A2	0.0254302	10.6191	0.0563695	0.133419	0.169898	15.0851			A2	0.0342091
	B2	0.040833	10.2015	0.208882	0.0581111	0.0877115	26.6014			B2	0.0368895
	C2	0.0392738	9.71921	0.247256	0.0573131	0.0972519	29.2214			C2	0.033857
		Ca	K	Mg	P	S
	A1	3.36 ± 1.12	1469.57 ± 567.49	11.14 ± 3.98	11.53 ± 1.29	16.37 ± 7.57
	A2	2.54 ± 0.87	1061.91 ± 441.73	5.64 ± 1.83	13.34 ± 1.94	16.99 ± 8.71
	B1	3.31 ± 1.03	1187.81 ± 510.5	11.71 ± 4.0	9.86 ± 1.41	16.52 ± 8.31
	B2	4.08 ± 1.15	1020.15 ± 389.26	20.89 ± 6.16	5.81 ± 1.03	8.77 ± 4.26
	C1	3.01 ± 1.11	1050.06 ± 450.22	8.97 ± 3.54	10.97 ± 1.37	16.69 ± 8.59
	C2	3.93 ± 1.31	971.92 ± 377.29	24.73 ± 8.88	5.73 ± 0.86	9.73 ± 4.83
			5days aq. Release - Average (mg/L)								5days aq. Release - Total (mg/L)
		Ca	K	Mg	P	S				Ca	K	Mg	P	S
	A1	3.36	1469.57	11.14	11.53	16.37			A1	16.8	7347.85	55.7	57.65	81.85		1g in 50ml = 20g in 1000ml = 20000mg in 1000ml
	A2	2.54	1061.91	5.64	13.34	16.99			A2	12.7	5309.55	28.2	66.7	84.95
	B1	3.31	1187.81	11.71	9.86	16.52			B1	16.55	5939.05	58.55	49.3	82.6
	B2	4.08	1020.15	20.89	5.81	8.77			B2	20.4	5100.75	104.45	29.05	43.85
	C1	3.01	1050.06	8.97	10.97	16.69			C1	15.05	5250.3	44.85	54.85	83.45
	C2	3.93	971.92	24.73	5.73	9.73			C2	19.65	4859.6	123.65	28.65	48.65
			5days aq. Release - Total (g/L)								5days aq. Release - Total (mg/L)
		Ca	K	Mg	P	S				Ca	K	Mg	P	S
	A1	0.0168	7.34785	0.0557	0.05765	0.08185			A1	16.8	7347.85	55.7	57.65	81.85
	B1	0.01655	5.93905	0.05855	0.0493	0.0826			B1	16.55	5939.05	58.55	49.3	82.6
	C1	0.01505	5.2503	0.04485	0.05485	0.08345			C1	15.05	5250.3	44.85	54.85	83.45
	A2	0.0127	5.30955	0.0282	0.0667	0.08495			A2	12.7	5309.55	28.2	66.7	84.95
	B2	0.0204	5.10075	0.10445	0.02905	0.04385			B2	20.4	5100.75	104.45	29.05	43.85
	C2	0.01965	4.8596	0.12365	0.02865	0.04865			C2	19.65	4859.6	123.65	28.65	48.65

## Sheet: Fert class data
			Biochar concentration by SEM-EDX (wt %)								Liming capacity
			Ca	K	Mg	P	S	N	C			%CCeq
		A1	2.33	7.57	0.93	0.47	0.26	3.95	78.95		A1	28.9427
		B1	4.5	13.18	0.99	0.66	0.23	3.28	67.03		B1	25.3895
		C1	4.69	10.77	0.92	0.73	0.22	3.25	74.19		C1	23.8548
		A2	3.83	8.96	0.74	0.83	0.24	5.32	73.08		A2	22.6037
		B2	3.78	12.21	1.05	0.54	0.06	2.63	67.77		B2	16.8485
		C2	2.64	9.28	0.86	0.46	0.06	3.67	73.84		C2	14.7633
			Total 5-day nutrient release/availability data (g/L)
			Ca	K	Mg	P	S	N				H/C
		A1	0.0168	7.34785	0.0557	0.05765	0.08185	13.6035			A1	0.0316656
		B1	0.01655	5.93905	0.05855	0.0493	0.0826	14.1596			B1	0.0372967
		C1	0.01505	5.2503	0.04485	0.05485	0.08345	13.8211			C1	0.0336973
		A2	0.0127	5.30955	0.0282	0.0667	0.08495	15.0851			A2	0.0342091
		B2	0.0204	5.10075	0.10445	0.02905	0.04385	26.6014			B2	0.0368895
		C2	0.01965	4.8596	0.12365	0.02865	0.04865	29.2214			C2	0.033857

## Sheet: Total Nitrogen Analysis
										Nitrogen Average	Nitrogen Std. Dev.	Nitrogen %RSD
										9.72	NaN
	Total Nitrogen									Analysis Date	Name	Sample Mass	Nitrogen Raw Area	Nitrogen	Nitrogen Blank Area	Nitrogen Mass	Time	Method
	Sample	Total nitrogen content%	mass of biochar (g)	mass of biomass (g)	Nitrogen loss (%)					2024-05-17 12:44:00	EDTA	0.1052	0.519	9.72	0.006378	0.0102	12:44:07	FP828 58012 3CM LOOP He
	A1	3.53	42.316	134.396	341.218					9.72	NaN
	B1	3.38	35.897	114.045	326.616					2024-05-17 12:47:00	EDTA	0.1077	0.532	9.72	0.006378	0.0105	12:47:40	FP828 58012 3CM LOOP He
	C1	3.27	40.891	132.921	308.831					3.53	NaN
	A2	3.38	22.009	64.385	134.026					2024-05-17 12:53:00	A1	0.10408	0.191	3.53	0.006378	0.00368	12:53:00	FP828 58012 3CM LOOP He
	B2	1.69	26.394	77.478	66.7839					3.38	NaN
	C2	1.57	24.577	71.527	62.5773					2024-05-17 12:56:00	A2	0.10364	0.182	3.38	0.006378	0.0035	12:56:31	FP828 58012 3CM LOOP He
	D1	3.07								3.38	NaN
	D2	1.16								2024-05-17 13:00:00	B1	0.10515	0.185	3.38	0.006378	0.00356	13:00:03	FP828 58012 3CM LOOP He
										1.69	NaN
										2024-05-17 13:03:00	B2	0.10095	0.0919	1.69	0.006378	0.00171	13:03:34	FP828 58012 3CM LOOP He
										3.07	NaN
										2024-05-17 13:07:00	D1	0.10417	0.167	3.07	0.006378	0.00319	13:07:04	FP828 58012 3CM LOOP He
										1.16	NaN
										2024-05-17 13:10:00	D2	0.10162	0.0654	1.16	0.006378	0.00118	13:10:35	FP828 58012 3CM LOOP He
										3.27	NaN
										2024-05-17 13:14:00	C1	0.10585	0.18	3.27	0.006378	0.00346	13:14:06	FP828 58012 3CM LOOP He
										1.57	NaN
										2024-05-17 13:17:00	C2	0.10373	0.088	1.57	0.006378	0.00163	13:17:36	FP828 58012 3CM LOOP He
										9.71	NaN
										2024-05-17 13:21:00	EDTA	0.10328	0.509	9.71	0.006378	0.01	13:21:05	FP828 58012 3CM LOOP He
										9.73	NaN
										2024-05-17 13:24:00	EDTA	0.10602	0.524	9.73	0.006378	0.0103	13:24:35	FP828 58012 3CM LOOP He
	Grinded dry water hyacinth samples pyrolysed at 600°C
Water hyacinth biomass (grinded)	pyrolysis duration	M1 = mass of empty crucible (g)	M2 = mass of crucible + dry sample (g)	M3 = mass of crucible + biochar (g)	MDS (M2-M1) = mass of dry sample (g)	MB (M3-M1) = mass of biochar (g)	% biochar yield = (MB/MDS)x100%
D1	A1	278.673	413.069	320.989	134.396	42.316	31.4861
	B1	278.141	392.186	314.038	114.045	35.897	31.4762
	C1	278.294	411.215	319.185	132.921	40.891	30.7634
D2	A2	277.325	341.71	299.334	64.385	22.009	34.1834
	B2	271.321	348.799	297.715	77.478	26.394	34.0664
	C2	276.924	348.451	301.501	71.527	24.577	34.3605
